# Supplementary material for: Trends in malaria cases, hospital admissions and deaths following scale-up of anti-malarial interventions, 2000–2010, Rwanda
Source: PubMed Central journal article supplement (PMC3502144; doi:10.1186/1475-2875-11-236), 2012-07-23
Supplement: 1475-2875-11-236-S1.pdf [file 1475-2875-11-236-S1.pdf]

Table 1. Percentage change in laboratory confirmed malaria cases, inpatient cases and deaths in 2010 compared to pre-intervention period (2000–2005) in hospitals and potential proportion of population protected by ITN, Rwanda, 2000-2010

| E endemicity                                                                  | Province | District   | Hospital      | Microscopy           |              |            |                             |           |            | Inpatient malaria cases |              |            | Malaria deaths |            |             | Confirmed cases/1000 population |             |            | Inpatient malaria cases/1000 population |           |             | Malaria deaths/100,000 population |             |            | Potential proportion of population protected by ITN (%) |           |             |           |             | Potential proportion of malaria cases treated with ACT at district level (%) |             |            |
|-------------------------------------------------------------------------------|----------|------------|---------------|----------------------|--------------|------------|-----------------------------|-----------|------------|-------------------------|--------------|------------|----------------|------------|-------------|---------------------------------|-------------|------------|-----------------------------------------|-----------|-------------|-----------------------------------|-------------|------------|---------------------------------------------------------|-----------|-------------|-----------|-------------|------------------------------------------------------------------------------|-------------|------------|
|                                                                               |          |            |               | Confirmed (Positive) |              |            | Slide positivity rate (SPR) |           |            | Average                 |              | Average    |                | Average    |             | Average                         |             | Average    |                                         | Average   |             | 2006                              | 2007        | 2008       | 2009                                                    | 2010      | 2008        | 2009      | 2010        |                                                                              |             |            |
|                                                                               |          |            |               | (2000-05)            | 2010         | % change   | (2000-05)                   | 2010      | % change   | (2000-05)               | 2010 change  | (2000-05)  | 2010 change    | (2000-05)  | 2010 change | (2000-05)                       | 2010 change | (2000-05)  | 2010 change                             | (2000-05) | 2010 change | (2000-05)                         | 2010 change | (2000-05)  | 2010 change                                             | (2000-05) | 2010 change | (2000-05) | 2010 change | (2000-05)                                                                    | 2010 change |            |
| High                                                                          | East     | Bugesera   | Nyamata       | 2,179                | 334          | -85        | 53                          | 8         | -85        | 592                     | 631          | 7          | 23             | 34         | 48          | 8                               | 1           | -88        | 2                                       | 2         | -14         | 8                                 | 10          | 21         | 46                                                      | 69        | 67          | 33        | 27          | 93                                                                           | 91          | 76         |
| High                                                                          | East     | Gatsibo    | Kiziguro      | 955                  | 336          | -65        | 45                          | 12        | -74        | 1,367                   | 946          | -31        | 35             | 31         | -11         | 3                               | 1           | -71        | 4                                       | 3         | -43         | 12                                | 8           | -28        | 43                                                      | 65        | 63          | 61        | 57          | 86                                                                           | 123         | 64         |
| High                                                                          | East     | Gatsibo    | Ngarama       | 1,313                | 435          | -67        | 36                          | 12        | -67        | 2,746                   | 562          | -80        | 132            | 48         | -64         | 4                               | 1           | -73        | 9                                       | 2         | -83         | 43                                | 13          | -70        | 43                                                      | 65        | 63          | 61        | 57          | 86                                                                           | 123         | 64         |
| High                                                                          | East     | Kayanza    | Gahini        | 777                  | 476          | -39        | 36                          | 9         | -75        | 776                     | 413          | -47        | 33             | 20         | -40         | 3                               | 2           | -49        | 3                                       | 2         | -56         | 15                                | 7           | -52        | 45                                                      | 71        | 69          | 36        | 95          | 93                                                                           | 70          | 65         |
| High                                                                          | East     | Ngoma      | Kibungo       | 1,998                | 274          | -86        | 30                          | 7         | -76        | 1,916                   | 638          | -67        | 79             | 35         | -56         | 8                               | 1           | -89        | 7                                       | 2         | -72         | 31                                | 11          | -64        | 44                                                      | 68        | 66          | 36        | 91          | 137                                                                          | 110         | 84         |
| High                                                                          | East     | Nyagatare  | Nyagatare     | 2,107                | 527          | -75        | 46                          | 26        | -44        | 1,156                   | 1,536        | 33         | 68             | 42         | -39         | 8                               | 2           | -80        | 4                                       | 5         | 9           | 25                                | 13          | -50        | 42                                                      | 67        | 65          | 112       | 106         | 80                                                                           | 92          | 89         |
| High                                                                          | East     | Rwamagana  | Rwamagana     | 2,971                | 807          | -73        | 43                          | 14        | -68        | 3,352                   | 1,178        | -65        | 93             | 8          | -91         | 13                              | 3           | -78        | 14                                      | 4         | -71         | 39                                | 3           | -93        | 46                                                      | 67        | 65          | 30        | 90          | 104                                                                          | 91          | 86         |
| <b>Subtotal (high transmission, East province)</b>                            |          |            |               | <b>12,302</b>        | <b>3,189</b> | <b>-74</b> | <b>41</b>                   | <b>12</b> | <b>-70</b> | <b>11,904</b>           | <b>5,904</b> | <b>-50</b> | <b>464</b>     | <b>218</b> | <b>-53</b>  | <b>7</b>                        | <b>1</b>    | <b>-79</b> | <b>6</b>                                | <b>3</b>  | <b>-59</b>  | <b>25</b>                         | <b>9</b>    | <b>-62</b> | <b>44</b>                                               | <b>67</b> | <b>65</b>   | <b>53</b> | <b>75</b>   | <b>103</b>                                                                   | <b>91</b>   | <b>81</b>  |
| Low                                                                           | North    | Gakenke    | Ruli          | 769                  | 34           | -96        | 35                          | 3         | -92        | 1,466                   | 61           | -96        | 40             | 4          | -90         | 2                               | 0           | -96        | 4                                       | 0         | -97         | 12                                | 1           | -92        | 38                                                      | 59        | 58          | 32        | 76          | 74                                                                           | 112         | 100        |
| Low                                                                           | North    | Gakenke    | Nemba         | 2,166                | 125          | -94        | 27                          | 4         | -87        | 548                     | 84           | -85        | 38             | 8          | -79         | 6                               | 0           | -95        | 2                                       | 0         | -88         | 11                                | 2           | -83        | 38                                                      | 59        | 58          | 32        | 76          | 74                                                                           | 112         | 100        |
| Low                                                                           | North    | Gicumbi    | Byumba        | 186                  | 158          | -15        | 11                          | 7         | -37        | 668                     | 175          | -74        | 41             | 18         | -56         | 0                               | 0           | -32        | 2                                       | 0         | -79         | 11                                | 4           | -65        | 33                                                      | 53        | 52          | 29        | 22          | 62                                                                           | 76          | 121        |
| Low                                                                           | North    | Musanze    | Ruhengeri     | 1,450                | 123          | -92        | 24                          | 2         | -92        | 1,470                   | 240          | -84        | 44             | 12         | -73         | 4                               | 0           | -93        | 4                                       | 1         | -87         | 13                                | 3           | -77        | 38                                                      | 61        | 59          | 32        | 24          | 101                                                                          | 113         | 84         |
| Low                                                                           | North    | Rulindo    | Rutongo       | 1,113                | 117          | -89        | 41                          | 10        | -76        | 1,006                   | 117          | -88        | 23             | 10         | -57         | 4                               | 0           | -91        | 4                                       | 0         | -90         | 9                                 | 3           | -65        | 28                                                      | 48        | 47          | 20        | 40          | 161                                                                          | 153         | 113        |
| <b>Subtotal, North province</b>                                               |          |            |               | <b>5,684</b>         | <b>557</b>   | <b>-90</b> | <b>138</b>                  | <b>25</b> | <b>-82</b> | <b>5,159</b>            | <b>677</b>   | <b>-87</b> | <b>185</b>     | <b>52</b>  | <b>-72</b>  | <b>4</b>                        | <b>0</b>    | <b>-92</b> | <b>3</b>                                | <b>0</b>  | <b>-89</b>  | <b>11</b>                         | <b>3</b>    | <b>-77</b> | <b>35</b>                                               | <b>56</b> | <b>55</b>   | <b>29</b> | <b>48</b>   | <b>108</b>                                                                   | <b>114</b>  | <b>106</b> |
| Low                                                                           | South    | Gisagara   | Gakoma        | 1,246                | 234          | -81        | 46                          | 9         | -80        | 183                     | 554          | 203        | 9              | 9          | 5           | 4                               | 1           | -85        | 1                                       | 2         | 147         | 3                                 | 3           | -13        | 37                                                      | 58        | 56          | 36        | 33          | 127                                                                          | 125         | 101        |
| Low                                                                           | South    | Kamonyi    | Remera-Rukoma | 1,782                | 442          | -75        | 28                          | 16        | -41        | 1,077                   | 284          | -74        | 50             | 10         | -80         | 6                               | 1           | -80        | 4                                       | 1         | -78         | 18                                | 3           | -84        | 48                                                      | 68        | 67          | 29        | 79          | 97                                                                           | 91          | 97         |
| Low                                                                           | South    | Muhanga    | Kabgayi       | 2,208                | 305          | -86        | 48                          | 6         | -88        | 1,804                   | 790          | -56        | 40             | 34         | -14         | 7                               | 1           | -89        | 6                                       | 2         | -64         | 13                                | 9           | -28        | 52                                                      | 70        | 68          | 27        | 76          | 125                                                                          | 90          | 98         |
| Low                                                                           | South    | Nyamagabe  | Kaduha        | 273                  | 135          | -51        | 25                          | 5         | -79        | 369                     | 53           | -86        | 15             | 3          | -80         | 1                               | 0           | -59        | 1                                       | 0         | -88         | 5                                 | 1           | -83        | 41                                                      | 64        | 62          | 38        | 83          | 83                                                                           | 87          | 93         |
| Low                                                                           | South    | Nyamagabe  | Kigeme        | 585                  | 69           | -88        | 22                          | 6         | -72        | 474                     | 147          | -69        | 35             | 20         | -43         | 2                               | 0           | -90        | 2                                       | 0         | -74         | 11                                | 5           | -52        | 41                                                      | 64        | 62          | 38        | 83          | 83                                                                           | 87          | 93         |
| Low                                                                           | South    | Nyanza     | Nyanza        | 1,281                | 788          | -38        | 45                          | 25        | -44        | 1,255                   | 500          | -60        | 41             | 30         | -27         | 5                               | 3           | -49        | 5                                       | 2         | -67         | 17                                | 10          | -41        | 37                                                      | 55        | 53          | 30        | 88          | 93                                                                           | 92          | 98         |
| Low                                                                           | South    | Ruhango    | Gitwe         | 1,390                | 310          | -78        | 43                          | 15        | -64        | 738                     | 73           | -90        | 22             | -          | -100        | 5                               | 1           | -82        | 3                                       | 0         | -92         | 8                                 | 0           | -100       | 51                                                      | 71        | 69          | 33        | 95          | 92                                                                           | 139         | 539        |
| <b>Subtotal, South province</b>                                               |          |            |               | <b>6,129</b>         | <b>1,739</b> | <b>-72</b> | <b>168</b>                  | <b>59</b> | <b>-65</b> | <b>4,978</b>            | <b>1,774</b> | <b>-64</b> | <b>180</b>     | <b>97</b>  | <b>-46</b>  | <b>4</b>                        | <b>1</b>    | <b>-76</b> | <b>4</b>                                | <b>1</b>  | <b>-71</b>  | <b>13</b>                         | <b>6</b>    | <b>-56</b> | <b>44</b>                                               | <b>64</b> | <b>62</b>   | <b>32</b> | <b>82</b>   | <b>101</b>                                                                   | <b>95</b>   | <b>97</b>  |
| Low                                                                           | West     | Karongi    | Kibuye        | 645                  | 178          | -72        | 28                          | 6         | -80        | 634                     | 183          | -71        | 22             | 15         | -32         | 2                               | 0           | -78        | 2                                       | 1         | -77         | 8                                 | 4           | -46        | 17                                                      | 39        | 38          | 34        | 84          | 86                                                                           | 91          | 94         |
| Low                                                                           | West     | Karongi    | Kirinda       | 1,136                | 114          | -90        | 31                          | 7         | -76        | 1,074                   | 141          | -87        | 20             | 5          | -75         | 4                               | 0           | -92        | 4                                       | 0         | -89         | 7                                 | 1           | -80        | 17                                                      | 39        | 38          | 34        | 84          | 86                                                                           | 91          | 94         |
| Low                                                                           | West     | Karongi    | Mugonero      | 360                  | 214          | -41        | 49                          | 12        | -75        | 483                     | 186          | -62        | 18             | 5          | -72         | 1                               | 1           | -51        | 2                                       | 1         | -68         | 6                                 | 1           | -77        | 17                                                      | 39        | 38          | 34        | 84          | 86                                                                           | 91          | 94         |
| Low                                                                           | West     | Ngororero  | Muhororo      | 1,016                | 154          | -85        | 52                          | 6         | -89        | 432                     | 199          | -54        | 17             | 10         | -42         | 3                               | 0           | -88        | 1                                       | 1         | -63         | 6                                 | 3           | -55        | 35                                                      | 56        | 55          | 32        | 90          | 79                                                                           | 98          | 80         |
| Low                                                                           | West     | Nyamashoke | Bushenge      | 279                  | 89           | -68        | 24                          | 6         | -74        | 751                     | 207          | -72        | 45             | 19         | -58         | 1                               | 0           | -75        | 2                                       | 0         | -78         | 13                                | 4           | -66        | 30                                                      | 51        | 50          | 32        | 28          | 114                                                                          | 114         | 84         |
| Low                                                                           | West     | Nyamashoke | Kibogora      | 1,447                | 596          | -59        | 25                          | 8         | -67        | 1,320                   | 290          | -78        | 48             | 8          | -83         | 4                               | 1           | -67        | 4                                       | 1         | -82         | 14                                | 2           | -87        | 30                                                      | 51        | 50          | 32        | 28          | 114                                                                          | 114         | 84         |
| Low                                                                           | West     | Ngororero  | Kabaya        | 259                  | 151          | -42        | 20                          | 8         | -58        | 290                     | 75           | -74        | 17             | 14         | -15         | 1                               | 0           | -53        | 1                                       | 0         | -79         | 6                                 | 4           | -33        | 35                                                      | 56        | 55          | 32        | 90          | 79                                                                           | 98          | 80         |
| Low                                                                           | West     | Rubavu     | Gisenyi       | 843                  | 403          | -52        | 30                          | 7         | -76        | 1,688                   | 227          | -87        | 91             | 24         | -74         | 3                               | 1           | -62        | 5                                       | 1         | -89         | 30                                | 6           | -79        | 33                                                      | 57        | 55          | 34        | 95          | 80                                                                           | 91          | 93         |
| Low                                                                           | West     | Rusizi     | Gihundwe      | 1,347                | 133          | -90        | 25                          | 5         | -80        | 1,773                   | 213          | -88        | 35             | 19         | -45         | 4                               | 0           | -92        | 5                                       | 0         | -90         | 10                                | 4           | -55        | 32                                                      | 54        | 53          | 32        | 28          | 56                                                                           | 74          | 100        |
| Low                                                                           | West     | Rusizi     | Mibirizi      | 1,060                | 263          | -75        | 42                          | 10        | -77        | 1,064                   | 576          | -46        | 34             | 41         | 20          | 3                               | 1           | -79        | 3                                       | 1         | -56         | 10                                | 9           | -2         | 32                                                      | 54        | 53          | 32        | 28          | 56                                                                           | 74          | 100        |
| Low                                                                           | West     | Rustsiro   | Murunda       | 695                  | 194          | -72        | 23                          | 4         | -83        | 421                     | 132          | -69        | 14             | 10         | -29         | 3                               | 1           | -78        | 2                                       | 0         | -75         | 5                                 | 3           | -44        | 24                                                      | 45        | 44          | 32        | 28          | 145                                                                          | 122         | 83         |
| <b>Subtotal, West province</b>                                                |          |            |               | <b>4,267</b>         | <b>939</b>   | <b>-78</b> | <b>197</b>                  | <b>39</b> | <b>-80</b> | <b>3,475</b>            | <b>1,234</b> | <b>-64</b> | <b>104</b>     | <b>71</b>  | <b>-32</b>  | <b>3</b>                        | <b>1</b>    | <b>-78</b> | <b>3</b>                                | <b>1</b>  | <b>-80</b>  | <b>10</b>                         | <b>4</b>    | <b>-62</b> | <b>27</b>                                               | <b>49</b> | <b>48</b>   | <b>33</b> | <b>61</b>   | <b>113</b>                                                                   | <b>102</b>  | <b>110</b> |
| <b>Subtotal (low, transmissison North, South and West provonice together)</b> |          |            |               | <b>6,358</b>         | <b>1,713</b> | <b>-73</b> | <b>36</b>                   | <b>8</b>  | <b>-79</b> | <b>5,428</b>            | <b>1,707</b> | <b>-69</b> | <b>174</b>     | <b>94</b>  | <b>-46</b>  | <b>4</b>                        | <b>1</b>    | <b>-80</b> | <b>3</b>                                | <b>1</b>  | <b>-78</b>  | <b>11</b>                         | <b>4</b>    | <b>-65</b> | <b>34</b>                                               | <b>55</b> | <b>54</b>   | <b>32</b> | <b>63</b>   | <b>107</b>                                                                   | <b>104</b>  | <b>104</b> |
| <b>Total</b>                                                                  |          |            |               | <b>28,381</b>        | <b>6,423</b> | <b>-77</b> | <b>35</b>                   | <b>10</b> | <b>-73</b> | <b>25,516</b>           | <b>9,589</b> | <b>-62</b> | <b>932</b>     | <b>438</b> | <b>-53</b>  | <b>4</b>                        | <b>1</b>    | <b>-80</b> | <b>4</b>                                | <b>1</b>  | <b>-71</b>  | <b>14</b>                         | <b>5</b>    | <b>-64</b> | <b>38</b>                                               | <b>59</b> | <b>58</b>   | <b>32</b> | <b>76</b>   | <b>105</b>                                                                   | <b>97</b>   | <b>93</b>  |

A negative percentage indicate a decrease of the indicator.
