# Supplementary material for: Trends in malaria cases, hospital admissions and deaths following scale-up of anti-malarial interventions, 2000–2010, Rwanda
Source: Malar J. 2012 Jul 23;11:236. doi: 10.1186/1475-2875-11-236 (PMC3502144; doi:10.1186/1475-2875-11-236)
Supplement: Additional file 2 — Table S2. Percentage change in malaria and non-malaria indicators in post intervention years (2006-2010) compared to pre-intervention period (2000–2005), for all ages and <5 years, in 30 of the 40 hospitals, Rwanda, 2000-2010. [file 1475-2875-11-236-S2.pdf]

Table 1. Percentage change in malaria and non-malaria indicators in post intervention years (2006-2010) compared to pre-intervention period (2000–2005), for all ages and <5 years, in 30 of the 40 hospitals, Rwanda, 2000-2010.

|                        |                                 | Pre-intervention average (2000-05) | Post intervention average (2006-10) | Values observed in 2010 | Observed change in pre-intervention (2000-2005) vs 2010 (%) | Observed change in pre-intervention (2000-2005) vs average of post-intervention (2006-2010) (%) | Changes in predicted versus observed values in post-intervention years (correcting for autocorrelation) |                            |                            |                            |                            |                            | Midpoint change during 2006-2010 <sup>a</sup> |
|------------------------|---------------------------------|------------------------------------|-------------------------------------|-------------------------|-------------------------------------------------------------|-------------------------------------------------------------------------------------------------|---------------------------------------------------------------------------------------------------------|----------------------------|----------------------------|----------------------------|----------------------------|----------------------------|-----------------------------------------------|
| Indicator              |                                 |                                    |                                     |                         |                                                             |                                                                                                 | Post-intervention year                                                                                  |                            |                            |                            |                            |                            |                                               |
|                        |                                 |                                    |                                     |                         |                                                             |                                                                                                 | Year 1 (2006)                                                                                           | Year 2 (2007)              | Year 3 (2008)              | 4 years (2009)             | Year 5 (2010)              |                            |                                               |
| CHILDREN UNDER 5 YEARS |                                 |                                    |                                     |                         |                                                             |                                                                                                 |                                                                                                         |                            |                            |                            |                            |                            |                                               |
| All-cause outpatient   | All-cause outpatient cases      | 21,002                             | 40,777                              | 48,991                  | 133                                                         | 48                                                                                              | 11% (-31% – 77%)                                                                                        | -4% (-43% – 59%)           | -30% (-60% – 22%)          | -6% (-48% – 72%)           | -26% (-61% – 41%)          | 29% (-19% – 107%)          |                                               |
|                        | All-cause admissions            | 32,847                             | 30,226                              | 27,536                  | -16                                                         | -9                                                                                              | 9% (-32% – 74%)                                                                                         | -40% (-65% – 1%)           | -54% (-74% – -18%)†        | -44% (-70% – 5%)           | <b>-53% (-76% – -8%)†</b>  | -26% (-54% – 19%)          |                                               |
|                        | All-cause deaths                | 1,635                              | 1,160                               | 1,073                   | -34                                                         | -41                                                                                             | 6% (-46% – 107%)                                                                                        | -26% (-65% – 55%)          | -37% (-72% – 43%)          | -37% (-74% – 54%)          | -28% (-73% – 89%)          | -26% (-62% – 44%)          |                                               |
| Malaria                | Outpatient malaria cases        | 3,721                              | 6,644                               | 2,293                   | -38                                                         | 44                                                                                              | -4% (-69% – 198%)                                                                                       | -53% (-86% – 60%)          | -68% (-92% – 21%)          | -67% (-92% – 39%)          | <b>-88% (-97% – -43%)†</b> | -38% (-80% – 93%)          |                                               |
|                        | Microscopically confirmed cases | N/A                                | N/A                                 | N/A                     | N/A                                                         | N/A                                                                                             | #N/A                                                                                                    | #N/A                       | #N/A                       | #N/A                       | #N/A                       | #N/A                       |                                               |
|                        | Slid positivity rate            | N/A                                | N/A                                 | N/A                     | N/A                                                         | N/A                                                                                             | #N/A                                                                                                    | #N/A                       | #N/A                       | #N/A                       | #N/A                       | #N/A                       |                                               |
|                        | Malaria admissions              | 14,548                             | 8,863                               | 4,757                   | -67                                                         | -64                                                                                             | -7% (-46% – 59%)                                                                                        | <b>-62% (-79% – -32%)†</b> | <b>-74% (-86% – -49%)†</b> | <b>-60% (-80% – -18%)†</b> | <b>-82% (-92% – -61%)†</b> | <b>-51% (-71% – -16%)†</b> |                                               |
|                        | Malaria deaths                  | 540                                | 237                                 | 135                     | -75                                                         | -127                                                                                            | -17% (-57% – 62%)                                                                                       | <b>-64% (-83% – -24%)†</b> | <b>-72% (-88% – -37%)†</b> | <b>-61% (-84% – -6%)†</b>  | <b>-77% (-91% – -40%)†</b> | <b>-57% (-78% – -17%)†</b> |                                               |
| Respiratory infections | OPD Respiratory infection       | 925                                | 2,149                               | 2,140                   | 131                                                         | 57                                                                                              | 57% (-53% – 425%)                                                                                       | 51% (-60% – 465%)          | -14% (-79% – 259%)         | 12% (-76% – 422%)          | -20% (-85% – 321%)         | 61% (-52% – 439%)          |                                               |
|                        | IPD Respiratory infection       | 2,600                              | 5,389                               | 7,294                   | 181                                                         | 52                                                                                              | 48% (-7% – 136%)                                                                                        | 30% (-23% – 118%)          | 73% (-2% – 205%)           | 147% (32% – 359%)          | 147% (26% – 385%)          | 98% (24% – 216%)           |                                               |
|                        | Deaths Respiratory infection    | 152                                | 164                                 | 184                     | 21                                                          | 7                                                                                               | 27% (-35% – 149%)                                                                                       | 13% (-46% – 138%)          | 84% (-19% – 316%)          | 116% (-12% – 427%)         | 131% (-12% – 509%)         | 40% (-28% – 174%)          |                                               |
| Diarrhoeal diseases    | OPD Diarrhoeal diseases         | 1,364                              | 2,705                               | 2,370                   | 74                                                          | 50                                                                                              | 11% (-49% – 141%)                                                                                       | -10% (-62% – 113%)         | -50% (-81% – 28%)          | -39% (-78% – 72%)          | <b>-69% (-90% – -44%)†</b> | 12% (-48% – 144%)          |                                               |
|                        | IPD Diarrhoeal diseases         | 2,738                              | 4,178                               | 4,602                   | 68                                                          | 34                                                                                              | 37% (-13% – 116%)                                                                                       | 1% (-39% – 67%)            | -2% (-44% – 71%)           | 15% (-37% – 111%)          | 6% (-45% – 104%)           | 29% (-18% – 103%)          |                                               |
|                        | Deaths Diarrhoeal diseases      | 67                                 | 73                                  | 62                      | -7                                                          | 9                                                                                               | 56% (-40% – 303%)                                                                                       | 18% (-59% – 240%)          | 54% (-52% – 390%)          | 51% (-57% – 434%)          | 35% (-66% – 432%)          | 28% (-50% – 232%)          |                                               |
| Non-malaria            | Non-malariaOPDcases             | 20,077                             | 38,628                              | 46,851                  | 133                                                         | 48                                                                                              | 19% (-42% – 143%)                                                                                       | 21% (-45% – 167%)          | -9% (-62% – 115%)          | 30% (-49% – 232%)          | 13% (-59% – 210%)          | 62% (-21% – 232%)          |                                               |
|                        | Non-malariaIPDcases             | 18,299                             | 21,362                              | 22,779                  | 24                                                          | 14                                                                                              | 21% (-22% – 88%)                                                                                        | -23% (-52% – 25%)          | -38% (-63% – 6%)           | -31% (-61% – 23%)          | -30% (-62% – 31%)          | -6% (-39% – 46%)           |                                               |
|                        | Non-malariaDeaths               | 1,095                              | 923                                 | 938                     | -14                                                         | -19                                                                                             | 18% (-41% – 135%)                                                                                       | -5% (-56% – 103%)          | -17% (-64% – 93%)          | -22% (-69% – 94%)          | 2% (-62% – 175%)           | -9% (-54% – 80%)           |                                               |
| 5 AND ABOVE YEARS      |                                 |                                    |                                     |                         |                                                             |                                                                                                 |                                                                                                         |                            |                            |                            |                            |                            |                                               |
| All-cause outpatient   | All-cause outpatient cases      | 115,282                            | 266,230                             | 349,565                 | 203                                                         | 57                                                                                              | 19% (5% – 35%)                                                                                          | 4% (-9% – 20%)             | <b>-20% (-31% – -7%)†</b>  | -1% (-16% – 17%)           | -13% (-27% – 4%)           | 48% (31% – 68%)            |                                               |
|                        | All-cause admissions            | 82,258                             | 109,116                             | 117,285                 | 43                                                          | 25                                                                                              | 28% (-18% – 101%)                                                                                       | 11% (-32% – 82%)           | -22% (-55% – 34%)          | -20% (-55% – 45%)          | -10% (-53% – 69%)          | 12% (-29% – 75%)           |                                               |
|                        | All-cause deaths                | 2,613                              | 2,723                               | 2,837                   | 9                                                           | 4                                                                                               | 16% (-20% – 68%)                                                                                        | 9% (-28% – 65%)            | -26% (-53% – 16%)          | -16% (-49% – 38%)          | -5% (-45% – 64%)           | -1% (-32% – 44%)           |                                               |
| Malaria                | Outpatient malaria cases        | 29,476                             | 6,797                               | 6,711                   | -77                                                         | -334                                                                                            | -75% (-71% – 129%)                                                                                      | -74% (-81% – 86%)          | <b>-72% (-94% – -31%)†</b> | <b>-70% (-97% – -52%)†</b> | -69% (-93% – 37%)          | -75% (-86% – 7%)           |                                               |
|                        | Microscopically confirmed cases | N/A                                | N/A                                 | N/A                     | N/A                                                         | N/A                                                                                             | #N/A                                                                                                    | #N/A                       | #N/A                       | #N/A                       | #N/A                       | #N/A                       |                                               |
|                        | Slid positivity rate            | N/A                                | N/A                                 | N/A                     | N/A                                                         | N/A                                                                                             | #N/A                                                                                                    | #N/A                       | #N/A                       | #N/A                       | #N/A                       | #N/A                       |                                               |
|                        | Malaria admissions              | 18,344                             | 10,537                              | 6,654                   | -64                                                         | -74                                                                                             | -66% (-34% – 54%)                                                                                       | <b>-67% (-68% – -19%)†</b> | <b>-67% (-82% – -48%)†</b> | <b>-68% (-73% – -14%)†</b> | <b>-69% (-83% – -42%)†</b> | <b>-66% (-64% – -17%)†</b> |                                               |
|                        | Malaria deaths                  | 680                                | 506                                 | 411                     | -40                                                         | -34                                                                                             | <b>-29% (-43% – -7%)†</b>                                                                               | -24% (-45% – 171%)         | -20% (-73% – 53%)          | -15% (-76% – 55%)          | <b>-10% (-67% – -7%)†</b>  | <b>-29% (-60% – -7%)†</b>  |                                               |
| Respiratory infections | OPD Respiratory infection       | 2,315                              | 3,469                               | 3,956                   | 71                                                          | 33                                                                                              | 24% (-47% – 191%)                                                                                       | 6% (-62% – 149%)           | -8% (-78% – 73%)           | -21% (-79% – 94%)          | -32% (-80% – 128%)         | 24% (-54% – 155%)          |                                               |
|                        | IPD Respiratory infection       | 2,368                              | 3,228                               | 3,702                   | 56                                                          | 27                                                                                              | 65% (-5% – 99%)                                                                                         | 68% (1% – 132%)            | 71% (-15% – 113%)          | 74% (-13% – 138%)          | 78% (3% – 206%)            | 65% (-1% – 108%)           |                                               |
|                        | Deaths Respiratory infection    | 155                                | 185                                 | 204                     | 31                                                          | 16                                                                                              | 40% (-15% – 64%)                                                                                        | 43% (10% – 130%)           | 47% (-23% – 72%)           | 50% (-22% – 87%)           | 54% (-4% – 147%)           | 40% (-9% – 77%)            |                                               |
| Diarrhoeal diseases    | OPD Diarrhoeal diseases         | 3,988                              | 2,848                               | 2,421                   | -39                                                         | -40                                                                                             | -50% (-95% – 890%)                                                                                      | -55% (-97% – 941%)         | -60% (-99% – 648%)         | -64% (-98% – 1,442%)       | -67% (-99% – 1,199%)       | -50% (-96% – 718%)         |                                               |
|                        | IPD Diarrhoeal diseases         | 1,813                              | 2,158                               | 2,118                   | 17                                                          | 16                                                                                              | 10% (-37% – 150%)                                                                                       | 7% (-41% – 173%)           | 5% (-61% – 107%)           | 2% (-62% – 133%)           | -1% (-63% – 166%)          | 10% (-44% – 125%)          |                                               |
|                        | Deaths Diarrhoeal diseases      | 55                                 | 47                                  | 49                      | -12                                                         | -18                                                                                             | 0% (-53% – 50%)                                                                                         | 5% (-33% – 140%)           | 10% (-33% – 84%)           | 15% (-50% – 132%)          | 20% (-47% – 175%)          | 0% (-46% – 72%)            |                                               |
| Non-malaria            | Non-malariaOPDcases             | 112,967                            | 262,761                             | 345,609                 | 206                                                         | 57                                                                                              | 104% (-42% – 132%)                                                                                      | 49% (-57% – 101%)          | 8% (-71% – 54%)            | -21% (-70% – 84%)          | -42% (-78% – 54%)          | 104% (-24% – 206%)         |                                               |
|                        | Non-malariaIPDcases             | 63,914                             | 98,579                              | 110,631                 | 73                                                          | 35                                                                                              | 41% (-18% – 121%)                                                                                       | 29% (-27% – 115%)          | 19% (-51% – 59%)           | 9% (-55% – 64%)            | 0% (-50% – 99%)            | 41% (-23% – 106%)          |                                               |
|                        | Non-malariaDeaths               | 1,934                              | 2,217                               | 2,426                   | 25                                                          | 13                                                                                              | 12% (-25% – 75%)                                                                                        | 6% (-34% – 66%)            | 1% (-55% – 23%)            | -4% (-54% – 38%)           | -8% (-49% – 67%)           | 12% (-33% – 55%)           |                                               |
| ALL AGES               |                                 |                                    |                                     |                         |                                                             |                                                                                                 |                                                                                                         |                            |                            |                            |                            |                            |                                               |
| All-cause outpatient   | All-cause outpatient cases      | 136,284                            | 307,007                             | 398,556                 | 192                                                         | 56                                                                                              | 18% (5% – 32%)                                                                                          | 3% (-9% – 17%)             | -21% (-31% – -10%)†        | -2% (-15% – 14%)           | -15% (-27% – 0%)           | 45% (30% – 63%)            |                                               |
|                        | All-cause admissions            | 115,105                            | 139,342                             | 144,821                 | 26                                                          | 17                                                                                              | 22% (-24% – 98%)                                                                                        | -4% (-44% – 63%)           | -32% (-62% – 23%)          | -27% (-61% – 38%)          | -24% (-61% – 52%)          | 1% (-38% – 63%)            |                                               |
|                        | All-cause deaths                | 4,248                              | 3,883                               | 3,910                   | -8                                                          | -9                                                                                              | 12% (-33% – 88%)                                                                                        | -4% (-46% – 72%)           | -30% (-63% – 32%)          | -23% (-61% – 54%)          | -12% (-59% – 86%)          | -10% (-46% – 51%)          |                                               |
| Malaria                | Outpatient malaria cases        | 33,198                             | 14,969                              | 9,004                   | -73                                                         | -122                                                                                            | -12% (-69% – 149%)                                                                                      | -41% (-81% – 85%)          | -71% (-92% – 2%)           | -70% (-92% – 15%)          | -71% (-93% – 25%)          | -54% (-83% – 31%)          |                                               |
|                        | Microscopically confirmed cases | 32,420                             | 11,099                              | 8,528                   | -74                                                         | -192                                                                                            | -17% (-63% – 87%)                                                                                       | <b>-80% (-92% – -50%)†</b> | <b>-88% (-95% – -67%)†</b> | <b>-72% (-90% – -19%)†</b> | <b>-72% (-91% – -12%)†</b> | <b>-67% (-85% – -25%)†</b> |                                               |
|                        | Slid positivity rate            | 35                                 | 11                                  | 9                       | -73                                                         | -218                                                                                            | <b>-29% (-39% – -17%)†</b>                                                                              | <b>-73% (-77% – -68%)†</b> | <b>-74% (-78% – -68%)†</b> | <b>-54% (-62% – -44%)†</b> | <b>-58% (-66% – -47%)†</b> | <b>-62% (-68% – -56%)†</b> |                                               |
|                        | Malaria admissions              | 32,892                             | 19,401                              | 11,411                  | -65                                                         | -70                                                                                             | -3% (-42% – 62%)                                                                                        | <b>-56% (-75% – -22%)†</b> | <b>-71% (-85% – -46%)†</b> | <b>-55% (-77% – -11%)†</b> | <b>-76% (-88% – -49%)†</b> | <b>-48% (-69% – -14%)†</b> |                                               |
|                        | Malaria deaths                  | 1,220                              | 743                                 | 546                     | -55                                                         | -64                                                                                             | <b>1% (-50% – -10%)†</b>                                                                                | -21% (-64% – 72%)          | -55% (-81% – 7%)           | -51% (-81% – 26%)          | <b>-47% (-81% – -10%)†</b> | <b>-37% (-69% – -10%)†</b> |                                               |
| Respiratory infections | OPD Respiratory infection       | 3,241                              | 5,618                               | 6,096                   | 88                                                          | 42                                                                                              | 33% (-49% – 251%)                                                                                       | 13% (-61% – 227%)          | -31% (-78% – 119%)         | -22% (-78% – 173%)         | -28% (-81% – 176%)         | 24% (-53% – 226%)          |                                               |
|                        | IPD Respiratory infection       | 4,968                              | 8,617                               | 10,996                  | 121                                                         | 42                                                                                              | 43% (-6% – 116%)                                                                                        | 40% (-12% – 123%)          | 56% (-6% – 161%)           | 104% (16% – 256%)          | 119% (19% – 302%)          | 73% (14% – 162%)           |                                               |
|                        | Deaths Respiratory infection    | 307                                | 349                                 | 388                     | 26                                                          | 12                                                                                              | 22% (-27% – 105%)                                                                                       | 40% (-21% – 148%)          | 45% (-23% – 171%)          | 61% (-19% – 218%)          | 88% (-10% – 293%)          | 33% (-20% – 123%)          |                                               |
| Diarrhoeal diseases    | OPD Diarrhoeal diseases         | 5,352                              | 5,553                               | 4,791                   | -10                                                         | 4                                                                                               | -18% (-90% – 580%)                                                                                      | -32% (-93% – 602%)         | -61% (-97% – 400%)         | -43% (-96% – 798%)         | -66% (-98% – 564%)         | -26% (-91% – 517%)         |                                               |
|                        | IPD Diarrhoeal diseases         | 4,550                              | 6,336                               | 6,720                   | 48                                                          | 28                                                                                              | 33% (-26% – 138%)                                                                                       | 11% (-42% – 112%)          | -4% (-53% – 95%)           | 9% (-50% – 136%)           | 5% (-54% – 142%)           | 23% (-32% – 120%)          |                                               |
|                        | Deaths Diarrhoeal diseases      | 122                                | 120                                 | 111                     | -9                                                          | -2                                                                                              | 21% (-38% – 136%)                                                                                       | 21% (-42% – 151%)          | 23% (-45% – 174%)          | 29% (-46% – 208%)          | 26% (-51% – 223%)          | 13% (-42% – 119%)          |                                               |
| Non-malaria            | Non-malariaOPDcases             | 133,044                            | 301,389                             | 392,460                 | 195                                                         | 56                                                                                              | 17% (-35% – 109%)                                                                                       | -3% (-49% – 85%)           | -29% (-65% – 42%)          | -18% (-62% – 75%)          | -35% (-71% – 48%)          | 54% (-14% – 176%)          |                                               |
|                        | Non-malariaIPDcases             | 82,213                             | 119,941                             | 133,410                 | 62                                                          | 31                                                                                              | 32% (-21% – 119%)                                                                                       | 14% (-35% – 100%)          | -18% (-55% – 51%)          | -18% (-58% – 60%)          | -7% (-55% – 90%)           | 19% (-29% – 97%)           |                                               |
|                        | Non-malariaDeaths               | 3,029                              | 3,140                               | 3,364                   | 11                                                          | 4                                                                                               | 16% (-32% – 100%)                                                                                       | 2% (-44% – 86%)            | -22% (-60% – 50%)          | -19% (-61% – 65%)          | -3% (-55% – 111%)          | -1% (-43% – 70%)           |                                               |

Note:

<sup>a</sup> Main measure of changes estimated for the midpoint year of 2006–2010 (predicted for mid point of 2006-2010 versus average observed value for 2006-2010)

A positive percentage (ratio between observed and predicted indicators level multiplied by 100) indicates an increase in the indicator.

A negative percentage indicate a decrease of the indicator.

†: Confidence Interval (CI) does not include zero and change of trend (pre versus post-intervention) is statistically significant, (P<0.05)
